# Supplementary material
Source: MDPI journal article supplement (https://www.mdpi.com/1424-8247/14/8/816)
Supplement: s1 [file s1]

# Supplementary information

of

**A design of experiments (DoE) approach to model the yield and chemical composition of ajowan (*Trachyspermum ammi* L.) essential oil obtained by microwave-assisted extraction**

Eugenia Mazzara<sup>a</sup>, Serena Scortichini<sup>b</sup>, Dennis Fiorini<sup>b</sup>, Filippo Maggi<sup>a</sup>, Riccardo Petrelli<sup>a</sup>, Loredana Cappellacci<sup>a</sup>, Giuseppe Morgese<sup>a</sup>, Mohammad Reza Morshedloo<sup>c</sup>, Giovanni Filippo Palmieri<sup>a</sup>, Marco Cespi<sup>a\*</sup>

<sup>a</sup>School of Pharmacy, University of Camerino, 62032 Camerino, Italy

<sup>b</sup>School of Science and Technology, University of Camerino, 62032 Camerino, Italy

<sup>c</sup>Department of Horticultural Science, Faculty of Agriculture, University of Maragheh, 55181 83111, Iran

\*Corresponding author: Marco Cespi (marco.cespi@unicam.it)

**Table S1:** FFR Coefficient analysis for yield (in coded unit)

| Term                            | Effect  | Coef    | SE Coef | T-Value | P-Value | VIF  |
|---------------------------------|---------|---------|---------|---------|---------|------|
| Constant                        |         | 2.4507  | 0.0515  | 47.59   | 0.000   |      |
| Microwave power (w/g)           | 0.2091  | 0.1045  | 0.0515  | 2.03    | 0.073   | 1.00 |
| Extraction time (min)           | 1.4136  | 0.7068  | 0.0515  | 13.73   | 0.000   | 1.00 |
| Water-to-seed ratio (%)         | 0.1734  | 0.0867  | 0.0515  | 1.68    | 0.126   | 1.00 |
| Preliminary moistening time (h) | 0.0879  | 0.0440  | 0.0515  | 0.85    | 0.415   | 1.00 |
| Preliminary milling process     | 0.2138  | 0.1069  | 0.0515  | 2.08    | 0.068   | 1.00 |
| Extraction cycle                | -0.2400 | -0.1200 | 0.0515  | -2.33   | 0.045   | 1.00 |

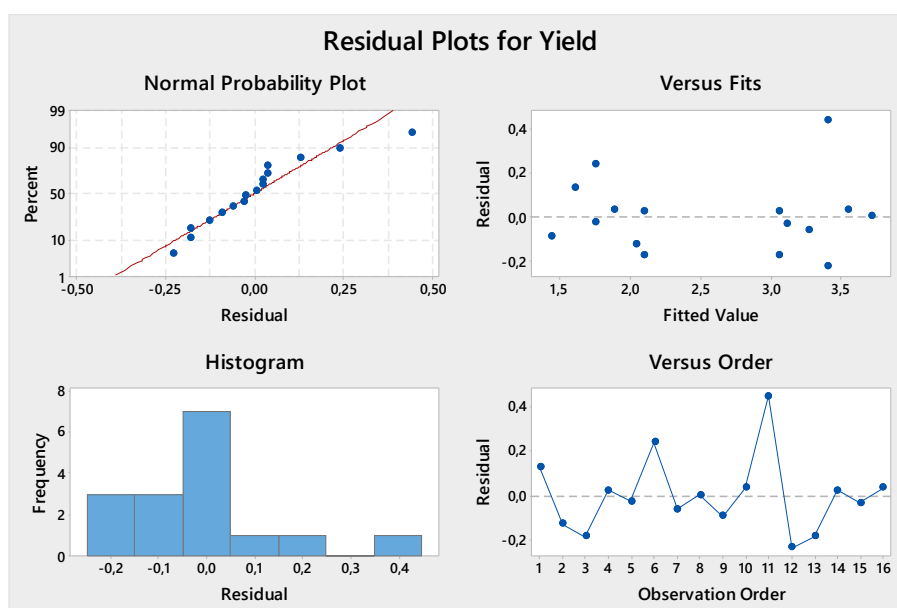

**Figure S1:** FFR Residuals analysis of yield %.

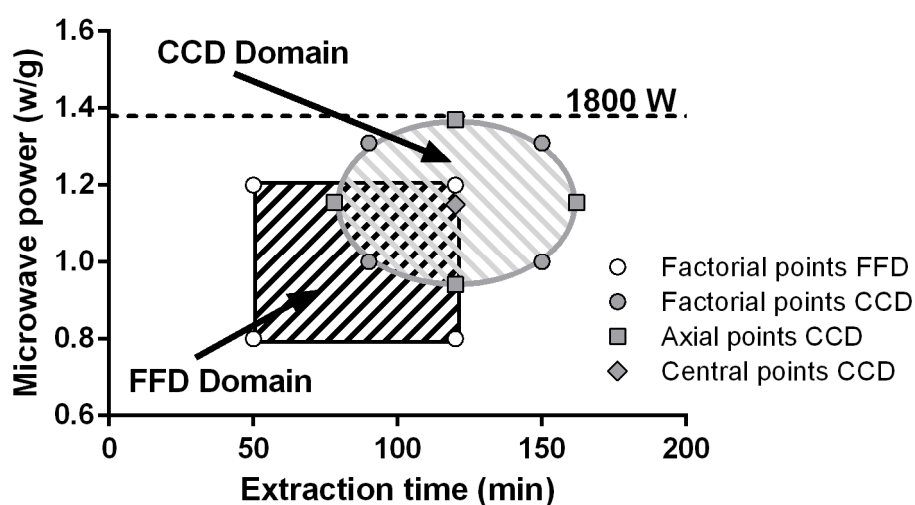

**Figure S2:** Experimental domain of the FFD and CCD for the variables irradiation power and extraction time. The dot line represents the maximum power values applicable by the microwave extractor.

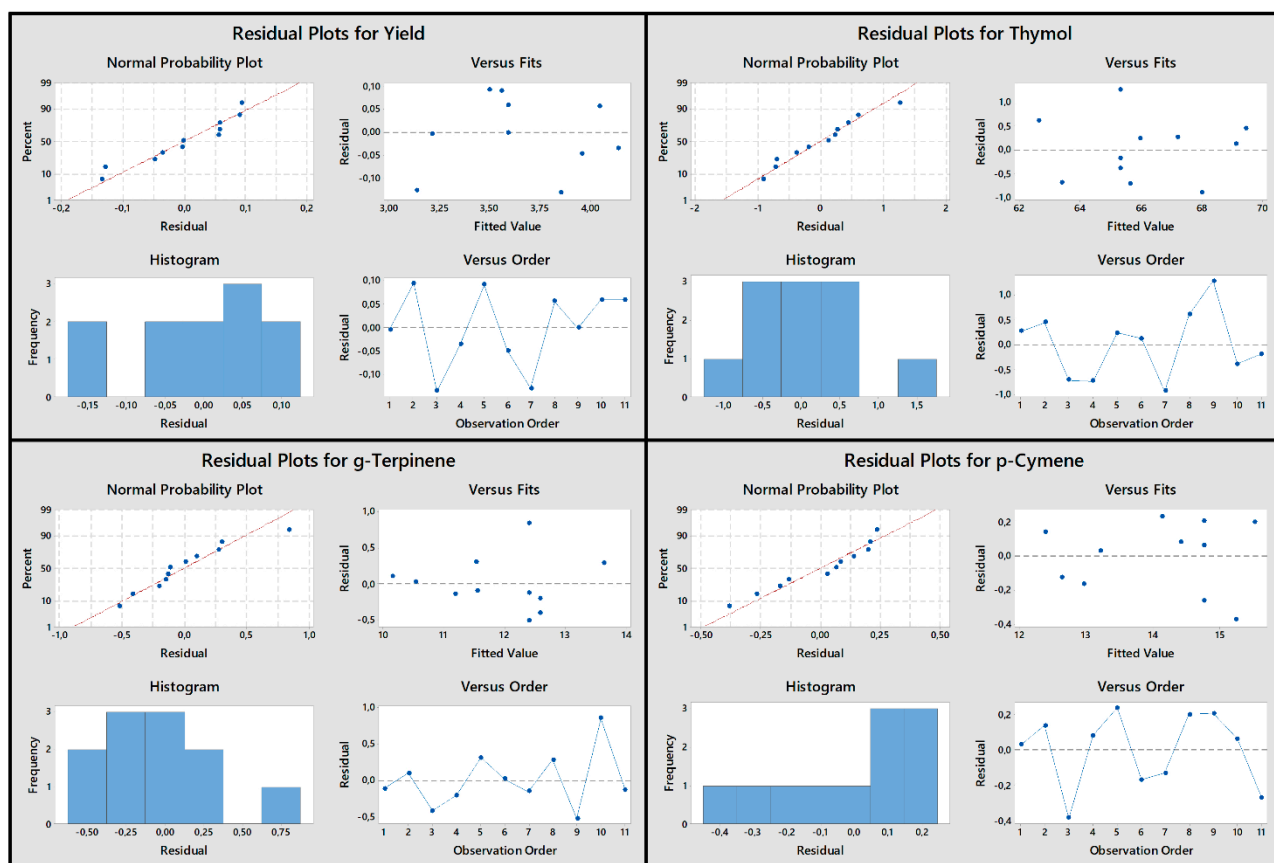

**Figure S3:** CCD Residuals analysis for yield (upper left panel). thymol (upper right panel).  $\gamma$ -terpinene (lower left panel) and p-cymene (lower right panel) content.

**Table S2:** CCD coefficient analysis for yield and thymol,  $\gamma$ -terpinene and p-cymene (lower right sub-table) content reported as coded variables. The abbreviation used are: MP, microwave power; ET, extraction time.

|                     | Term            | Coef   | SE Coef | T-Value | P-Value | VIF  |
|---------------------|-----------------|--------|---------|---------|---------|------|
| Yield               | Constant        | 3.5918 | 0.0406  | 88.55   | 0       |      |
|                     | MP              | 0.141  | 0.0341  | 4.13    | 0.004   | 1    |
|                     | ET              | 0.3202 | 0.0341  | 9.38    | 0       | 1    |
|                     | MP <sup>2</sup> | 0.0838 | 0.0388  | 2.16    | 0.068   | 1    |
|                     |                 |        |         |         |         |      |
|                     | Term            | Coef   | SE Coef | T-Value | P-Value | VIF  |
| Thymol              | Constant        | 65.313 | 0.332   | 196.56  | 0       |      |
|                     | MP              | 1.124  | 0.28    | 4.02    | 0.005   | 1    |
|                     | ET              | -1.905 | 0.28    | -6.81   | 0       | 1    |
|                     | MP <sup>2</sup> | 1.112  | 0.318   | 3.5     | 0.01    | 1    |
|                     |                 |        |         |         |         |      |
|                     | Term            | Coef   | SE Coef | T-Value | P-Value | VIF  |
| $\gamma$ -terpinene | Constant        | 12.401 | 0.205   | 60.62   | 0       |      |
|                     | MP              | -0.35  | 0.172   | -2.03   | 0.088   | 1    |
|                     | ET              | 0.867  | 0.172   | 5.04    | 0.002   | 1    |
|                     | MP <sup>2</sup> | -0.686 | 0.196   | -3.5    | 0.013   | 1    |
|                     | MP* ET          | 0.35   | 0.243   | 1.44    | 0.201   | 1    |
|                     | Term            | Coef   | SE Coef | T-Value | P-Value | VIF  |
| p-cymene            | Constant        | 14.753 | 0.155   | 95.4    | 0       |      |
|                     | MP              | -0.415 | 0.0947  | -4.38   | 0.005   | 1    |
|                     | ET              | 1.0192 | 0.0947  | 10.76   | 0       | 1    |
|                     | MP <sup>2</sup> | -0.603 | 0.113   | -5.35   | 0.002   | 1.09 |
|                     | ET <sup>2</sup> | -0.341 | 0.113   | -3.02   | 0.023   | 1.09 |

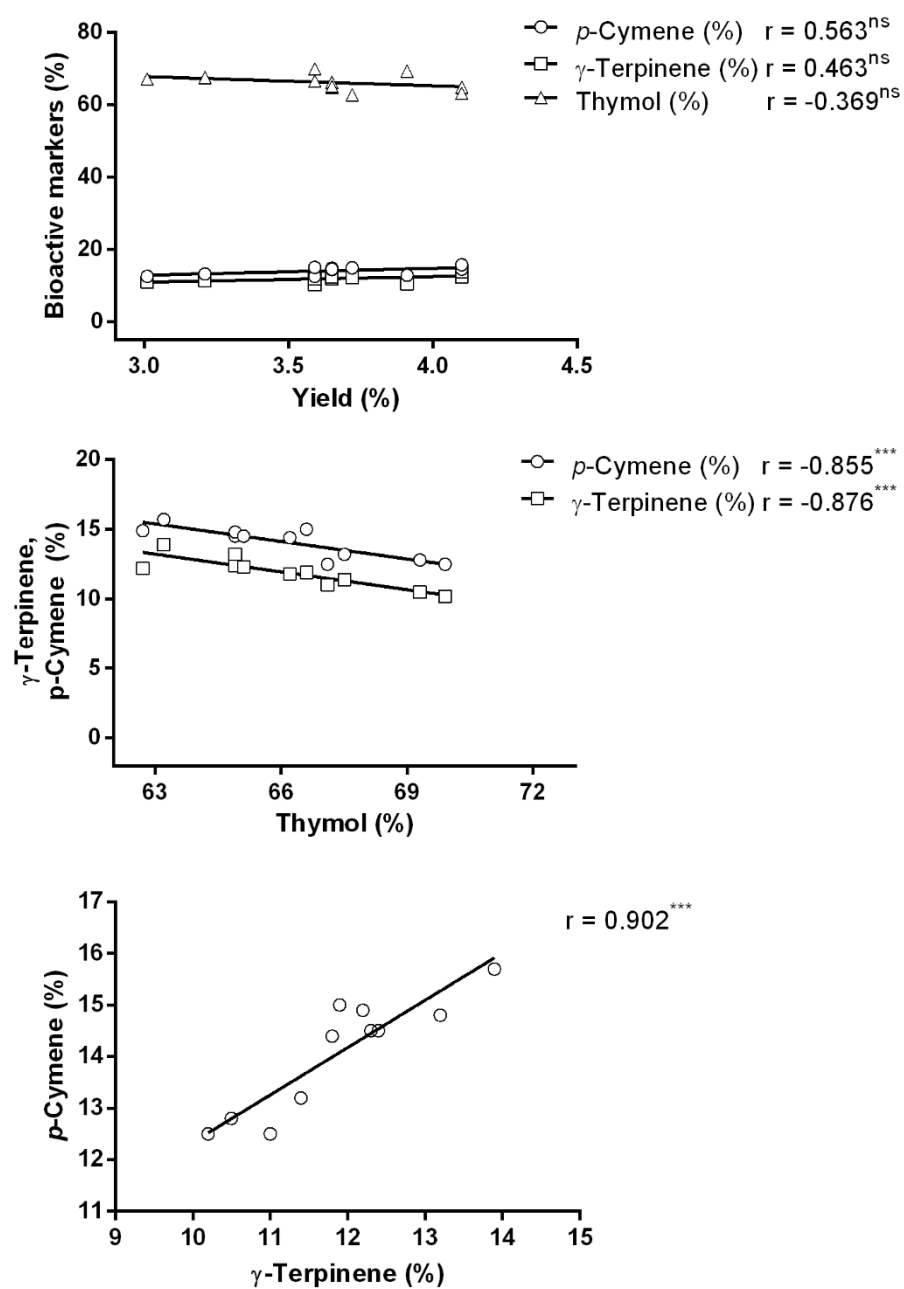

**Figure S4:** Pearson correlation between all the responses accurately modelled by the CCD.

**Table S3:** Chemical composition of the ajowan essential oils obtained by HD (HD<sub>V1</sub> and HD<sub>CONV</sub>) and MAE (E<sub>OPT</sub> and E<sub>V1</sub>)

| N°               | Component <sup>a</sup>                    | RI <sup>b</sup> | RI LIT. <sup>c</sup> | Relative peak area (%) |                 |                  |                    | ID <sup>d</sup> |
|------------------|-------------------------------------------|-----------------|----------------------|------------------------|-----------------|------------------|--------------------|-----------------|
|                  |                                           |                 |                      | MAE                    |                 | HD               |                    |                 |
|                  |                                           |                 |                      | E <sub>OPT</sub>       | E <sub>V1</sub> | HD <sub>V1</sub> | HD <sub>CONV</sub> |                 |
| 1 <sup>*</sup>   | <b>α-thujene</b>                          | <b>920</b>      | 924                  | 0.1                    | 0.2             | 0.1              | 0.2                | RI.MS           |
| 2 <sup>*</sup>   | α-pinene                                  | 926             | 932                  | tr                     | tr              | tr <sup>e</sup>  | tr                 | RI.MS           |
| 3 <sup>*</sup>   | sabinene                                  | 965             | 969                  |                        | tr              | tr               |                    | RI.MS           |
| 4 <sup>*</sup>   | β-pinene                                  | 967             | 974                  | 0.4                    | 0.6             | 0.6              | 0.8                | RI.MS           |
| 5 <sup>*</sup>   | myrcene                                   | 989             | 988                  | 0.1                    | 0.2             | 0.1              | 0.1                | RI.MS           |
| 6 <sup>*</sup>   | α-terpinene                               | 1014            | 1014                 | tr                     | 0.1             | 0.1              | tr                 | RI.MS           |
| 7 <sup>*</sup>   | p-cymene                                  | 1022            | 1021                 | 15.6                   | 18.1            | 18.2             | 21.8               | Std             |
| 8 <sup>*</sup>   | β-phellandrene                            | 1025            | 1024                 | 0.2                    | 0.2             | 0.3              | 0.3                | RI.MS           |
| 9 <sup>*</sup>   | γ-terpinene                               | 1055            | 1054                 | 11.5                   | 12.6            | 14.0             | 16.8               | Std             |
| 10 <sup>**</sup> | trans sabinene hydrate                    | 1095            | 1098                 |                        | 0.1             | tr               |                    | RI.MS           |
| 11 <sup>**</sup> | terpinen-4-ol                             | 1173            | 1174                 |                        | tr              | tr               |                    | RI.MS           |
| 12 <sup>**</sup> | thymol                                    | 1296            | 1289                 | 70.2                   | 66.6            | 65.4             | 57.5               | Std             |
| 13 <sup>**</sup> | carvacrol                                 | 1301            | 1298                 | 1.3                    | 1.2             | 1.0              | 1.2                | Std             |
|                  | Total identified (%)                      |                 |                      | 99.3                   | 99.8            | 99.9             | 98.6               |                 |
|                  | Grouped compounds                         |                 |                      |                        |                 |                  |                    |                 |
|                  | Monoterpene hydrocarbons <sup>*</sup> (%) |                 |                      | 27.9                   | 31.9            | 33.5             | 40.0               |                 |
|                  | Oxygenated monoterpenes <sup>**</sup> (%) |                 |                      | 71.5                   | 67.9            | 66.4             | 58.6               |                 |

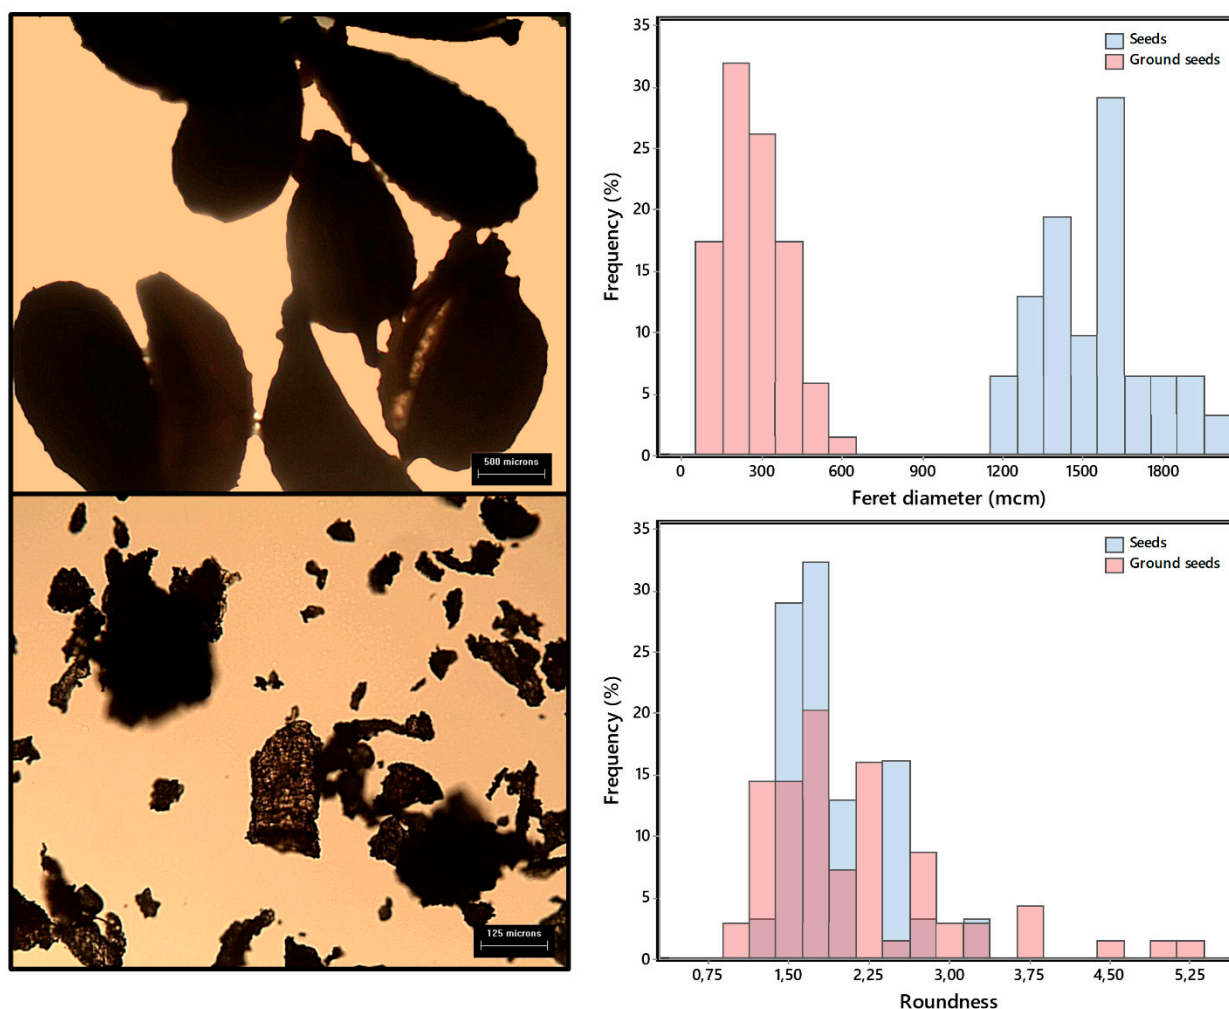

**Figure S5:** Effect of the milling process on the size and roundness of ajowan schizocarps. The microscopic pictures of schizocarps as received and grounded are reported in the upper and lower left panel respectively, while the particle size and the roundness values distributions of grounded and ungrounded schizocarps are reported in the upper and lower right panels respectively. Pictures were acquired using an optical microscope (MT9000, Meiji Techno Co. Ltd, JP) equipped with a 3-megapixel CMOS camera (Invenio 3S, DeltaPix, DK). The objective lens were a 2.5X and 10X for grounded and ungrounded schizocarps respectively. Size and roundness analysis were carried out using image analysis software (Image Pro Plus, Media Cybernetics Inc.). The size reported refers to the mean Feret diameter. The particles size distributions were characterized by the following values ( $\mu\text{m}$ ): D50 of 1554 and IQR of 247 for ungrounded seeds, D50 of 253 and IQR of 180 for grounded seeds. The roundness distributions were characterized by the following values: median of 1.71 and IQR of 0.49 for ungrounded seeds, median of 1.86 and IQR of 0.92 for grounded seeds.

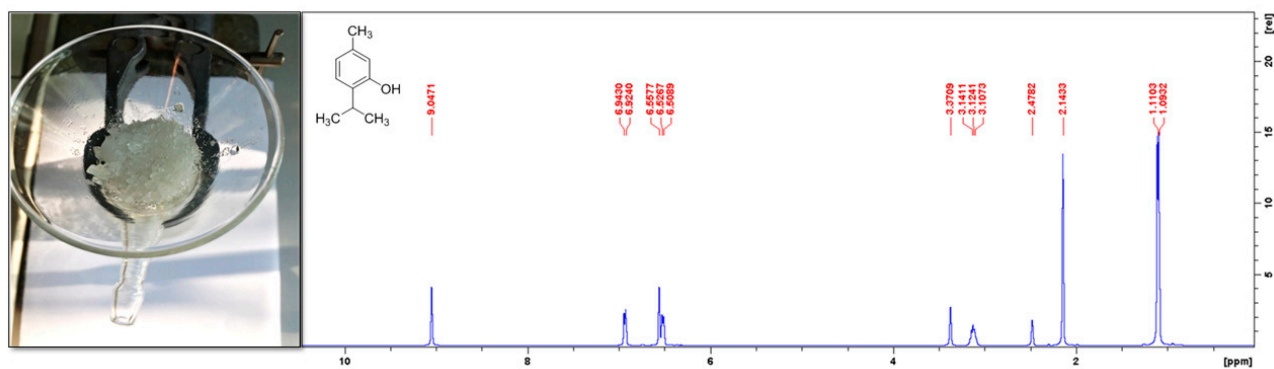

**Figure S6:** Images of the crystals isolated from the ajowan EO (on the left) and their  $^1\text{H}$  NMR spectrum.
